# Supplementary material
Source: PubMed Central journal article supplement (PMC1838496)
Supplement: pnas_0611470104_1.pdf [file pnas_0611470104_1.pdf]

**Table 1. List of predicted genes on fosmid HF10\_19P19 (41802 bp).**

| N  | Start | End   | Strand | Description                                                                | Best BLASTP hit |         |            |                                                               |
|----|-------|-------|--------|----------------------------------------------------------------------------|-----------------|---------|------------|---------------------------------------------------------------|
|    |       |       |        |                                                                            | GenBank gi      | -log(e) | % Identity | Taxonomic affiliation                                         |
| 1  | 3     | 330   | -      | Flagellar motor protein MotB                                               | 91218602        | 56      | 100        | <i>Psychroflexus torquis</i> (Bacteroidetes/Chlorobi)         |
| 2  | 386   | 1147  | -      | Flagellar motor protein MotA                                               | 68164501        | >100    | 78         | uncultured marine bacterium BAC17H8                           |
| 3  | 1342  | 1914  | +      | Hypothetical protein                                                       | 68164500        | 38      | 51         | uncultured marine bacterium BAC17H8                           |
| 4  | 1911  | 2093  | -      | Hypothetical protein                                                       | -----           |         |            |                                                               |
| 5  | 2411  | 3925  | +      | DNA-directed RNA polymerase specialized sigma subunit, sigma54             | 68164498        | >100    | 49         | uncultured marine bacterium BAC17H8                           |
| 6  | 4042  | 4221  | -      | Hypothetical protein                                                       | -----           |         |            |                                                               |
| 7  | 4340  | 5686  | -      | Peptidase                                                                  | 68164492        | 54      | 34         | uncultured marine bacterium BAC17H8                           |
| 8  | 5696  | 6073  | -      | Hypothetical protein                                                       | 68164491        | 10      | 32         | uncultured marine bacterium BAC17H8                           |
| 9  | 6272  | 6661  | +      | Membrane protein                                                           | 87198088        | 12      | 33         | <i>Novosphingobium aromaticivorans</i> (Alpha Proteobacteria) |
| 10 | 6673  | 7110  | +      | Membrane protein                                                           | 68164489        | 21      | 42         | uncultured marine bacterium BAC17H8                           |
| 11 | 7103  | 7441  | +      | Hypothetical protein                                                       | 68164488        | 14      | 39         | uncultured marine bacterium BAC17H8                           |
| 12 | 7417  | 7746  | -      | Hypothetical protein                                                       | -----           |         |            |                                                               |
| 13 | 7763  | 8212  | -      | Hypothetical protein                                                       | 68164493        | 5       | 28         | uncultured marine bacterium BAC17H8                           |
| 14 | 8533  | 8877  | +      | Hypothetical protein                                                       | -----           |         |            |                                                               |
| 15 | 8911  | 9558  | -      | Hypothetical protein                                                       | 67906762        | 82      | 64         | uncultured marine bacterium MedeBAC46A06                      |
| 16 | 9716  | 10858 | +      | Aminotransferase                                                           | 85704324        | >100    | 60         | <i>Roseovarius sp.</i> (Alpha Proteobacteria)                 |
| 17 | 11065 | 11463 | -      | Phosphoribosyl-AMP cyclohydrolase                                          | 78700320        | 38      | 63         | <i>Alkalimnicola ehrlichei</i> (Gamma Proteobacteria)         |
| 18 | 11598 | 11765 | +      | Hypothetical protein                                                       | -----           |         |            |                                                               |
| 19 | 11774 | 12367 | -      | Methyltransferase type 12                                                  | 94310012        | 21      | 42         | <i>Loktanella vestfoldensis</i> (Alpha Proteobacteria)        |
| 20 | 12364 | 13230 | -      | Sulfate/tungstate uptake family ABC transporter, substrate-binding protein | 56678404        | 70      | 52         | <i>Ralstonia metallidurans</i> (Beta Proteobacteria)          |
| 21 | 13372 | 13782 | +      | Transcriptional regulator, ModE family                                     | 87200527        | 6       | 36         | <i>Silicibacter pomeroyi</i> (Alpha Proteobacteria)           |
| 22 | 13832 | 14119 | +      | Hypothetical protein                                                       | 67906748        | 24      | 56         | <i>Novosphingobium aromaticivorans</i> (Alpha Proteobacteria) |
| 23 | 14138 | 14590 | +      | Hypothetical protein                                                       | 67906749        | 22      | 45         | uncultured marine bacterium MedeBAC46A06                      |
| 24 | 14630 | 14875 | +      | Hypothetical protein                                                       | 83950410        | 5       | 48         | <i>Roseovarius nubinhibens</i> (Alpha Proteobacteria)         |
| 25 | 14875 | 15975 | +      | ATPase                                                                     | 67906750        | >100    | 71         | uncultured marine bacterium MedeBAC46A06                      |
| 26 | 15972 | 16760 | +      | Hypothetical protein                                                       | 67906751        | 61      | 49         | uncultured marine bacterium MedeBAC46A06                      |
| 27 | 16757 | 17272 | +      | Ribosomal protein L7/L12                                                   | 67906752        | 47      | 57         | uncultured marine bacterium MedeBAC46A06                      |
| 28 | 17241 | 18248 | +      | Hypothetical protein                                                       | 67906753        | >100    | 57         | uncultured marine bacterium MedeBAC46A06                      |
| 29 | 18312 | 20321 | -      | Iron-sulfur cluster-binding protein                                        | 67906754        | >100    | 59         | uncultured marine bacterium MedeBAC46A06                      |
| 30 | 20469 | 21077 | +      | Hypothetical protein                                                       | 67906755        | 52      | 55         | uncultured marine bacterium MedeBAC46A06                      |
| 31 | 21105 | 21848 | +      | Hypothetical protein                                                       | 67906756        | 36      | 40         | uncultured marine bacterium MedeBAC46A06                      |
| 32 | 22048 | 22671 | +      | Cytoplasmic chaperone TorD                                                 | 67906757        | 64      | 61         | uncultured marine bacterium MedeBAC46A06                      |
| 33 | 22747 | 22941 | +      | Hypothetical protein                                                       | 89092830        | 7       | 49         | <i>Oceanospirillum sp.</i> (Gamma Proteobacteria)             |
| 34 | 22993 | 25884 | +      | Anaerobic dehydrogenase alpha subunit                                      | 67906758        | >100    | 89         | uncultured marine bacterium MedeBAC46A06                      |
| 35 | 25897 | 26490 | +      | Anaerobic dehydrogenase, iron-sulfur subunit                               | 83941749        | >100    | 89         | <i>Sulfitobacter sp.</i> (Alpha Proteobacteria)               |
| 36 | 26837 | 27919 | +      | Anaerobic dehydrogenase gamma subunit                                      | 67906759        | >100    | 72         | uncultured marine bacterium MedeBAC46A06                      |
| 37 | 28072 | 29379 | +      | WD domain/cytochrome C family protein                                      | 67906760        | >100    | 58         | uncultured marine bacterium MedeBAC46A06                      |
| 38 | 29398 | 29520 | +      | Hypothetical protein                                                       | -----           |         |            |                                                               |
| 39 | 29571 | 30272 | +      | Trypsin-like serine protease                                               | 67906761        | 58      | 54         | uncultured marine bacterium MedeBAC46A06                      |
| 40 | 30364 | 31260 | +      | Molybdenum cofactor biosynthesis protein A                                 | 67527057        | >100    | 70         | uncultured marine bacterium 66A03                             |
| 41 | 31445 | 31984 | +      | Molybdopterin-guanine dinucleotide biosynthesis protein                    | 71847033        | 43      | 56         | <i>Dechloromonas aromatica</i> (Beta Proteobacteria)          |
| 42 | 31993 | 33225 | +      | Molybdopterin biosynthesis protein                                         | 67527055        | 90      | 44         | uncultured marine bacterium 66A03                             |
| 43 | 33225 | 33476 | +      | Molybdopterin-converting factor, small subunit                             | 23016726        | 22      | 60         | Magnetospirillum magnetotacticum MS-1                         |
| 44 | 33481 | 33960 | +      | Molybdopterin-converting factor large subunit                              | 27382584        | 42      | 52         | <i>Bradyrhizobium japonicum</i> (Alpha Proteobacteria)        |
| 45 | 34208 | 35227 | -      | Isopentenyl diphosphate delta-isomerase Idi                                | 68164580        | 86      | 54         | uncultured marine bacterium BAC17H8                           |
| 46 | 35224 | 36084 | -      | 15,15'-beta-carotene dioxygenase Blh                                       | 67527050        | 50      | 40         | uncultured marine bacterium 66A03                             |
| 47 | 36127 | 37257 | -      | Lycopene cyclase CrtY                                                      | 68164582        | 73      | 41         | uncultured marine bacterium BAC17H8                           |
| 48 | 37254 | 38237 | -      | Phytoene synthase CrtB                                                     | 67527048        | 68      | 47         | uncultured marine bacterium 66A03                             |
| 49 | 38218 | 39765 | -      | Phytoene dehydrogenase CrtI                                                | 67906784        | >100    | 71         | uncultured marine bacterium MedeBAC46A06                      |
| 50 | 39855 | 40871 | -      | Geranylgeranyl pyrophosphate synthetase CrtE                               | 67527046        | 86      | 51         | uncultured marine bacterium 66A03                             |
| 51 | 40993 | 41766 | -      | Proteorhodopsin                                                            | 67527045        | 97      | 67         | uncultured marine bacterium 66A03                             |
