# Supplementary material
Source: PubMed Central journal article supplement (PMC1838496)
Supplement: pnas_0611470104_2.pdf [file pnas_0611470104_2.pdf]

**Table 2. List of predicted genes on fosmid HF10\_25F10 (40220 bp).**

| N  | Start | End   | Strand | Description                                      | Best BLASTP hit |         |            |                                               |
|----|-------|-------|--------|--------------------------------------------------|-----------------|---------|------------|-----------------------------------------------|
|    |       |       |        |                                                  | GenBank gi      | -log(e) | % Identity | Taxonomic affiliation                         |
| 1  | 96    | 365   | +      | Hypothetical protein                             | 67906766        | 44      | 98         | uncultured bacterium MedeBAC46A06             |
| 2  | 460   | 2724  | +      | Hypothetical protein                             | 67906767        | >100    | 94         | uncultured bacterium MedeBAC46A06             |
| 3  | 2732  | 4024  | +      | Histidinol dehydrogenase                         | 67906768        | >100    | 89         | uncultured bacterium MedeBAC46A06             |
| 4  | 4069  | 4566  | +      | Sulfopyruvate decarboxylase subunit alpha        | 67906769        | >100    | 55         | uncultured bacterium MedeBAC46A06             |
| 5  | 4571  | 5125  | +      | Sulfopyruvate decarboxylase subunit ComD         | 67906770        | >100    | 83         | uncultured bacterium MedeBAC46A06             |
| 6  | 5139  | 5903  | +      | Gluconate 5-dehydrogenase                        | 67906771        | 93      | 69         | uncultured bacterium MedeBAC46A06             |
| 7  | 5900  | 6883  | +      | Sorbitol dehydrogenase                           | 67906772        | 82      | 74         | uncultured bacterium MedeBAC46A06             |
| 8  | 6976  | 7740  | +      | Deoxyribodipyrimidine photolyase                 | 67906774        | 48      | 69         | uncultured bacterium MedeBAC46A06             |
| 9  | 7733  | 8182  | +      | Unknown                                          | 68164595        | 0       | 28         | uncultured bacterium BAC17H8                  |
| 10 | 8269  | 9801  | +      | Propionyl-CoA carboxylase beta subunit           | 68164594        | >100    | 87         | uncultured bacterium BAC17H8                  |
| 11 | 9844  | 11820 | +      | Propionyl-CoA carboxylase alpha subunit          | 67906776        | >100    | 93         | uncultured bacterium MedeBAC46A06             |
| 12 | 11817 | 12989 | -      | Amidohydrolase family protein                    | 86138204        | >100    | 95         | <i>Roseobacter sp.</i> (Alpha Proteobacteria) |
| 13 | 12986 | 14605 | -      | Oxidoreductase                                   | 67906777        | >100    | 80         | uncultured bacterium MedeBAC46A06             |
| 14 | 14726 | 15472 | +      | Membrane protein                                 | 68164591        | >100    | 84         | uncultured bacterium BAC17H8                  |
| 15 | 15481 | 16095 | +      | 3-Methyladenine DNA glycosylase                  | 67906779        | >100    | 80         | uncultured bacterium MedeBAC46A06             |
| 16 | 16112 | 16504 | -      | Unknown                                          | 68164589        | >100    | 66         | uncultured bacterium BAC17H8                  |
| 17 | 16416 | 16778 | -      | Alpha-amylase                                    | 41411249        | >100    | 71         | <i>Butyrivibrio fibrisolvens</i> (Clostridia) |
| 18 | 16879 | 17697 | -      | Hypothetical protein                             | 67906781        | >100    | 79         | uncultured bacterium MedeBAC46A06             |
| 19 | 18271 | 19047 | +      | Proteorhodopsin                                  | 68164586        | 98      | 70         | uncultured bacterium BAC17H8                  |
| 20 | 19146 | 20171 | +      | Geranylgeranyl pyrophosphate synthase CrtE       | 67906783        | 69      | 87         | uncultured bacterium MedeBAC46A06             |
| 21 | 20182 | 21756 | +      | Phytoene dehydrogenase CrtI                      | 67906784        | >100    | 87         | uncultured bacterium MedeBAC46A06             |
| 22 | 21775 | 22692 | +      | Phytoene synthase CrtB                           | 67906785        | >100    | 85         | uncultured bacterium MedeBAC46A06             |
| 23 | 22643 | 23791 | +      | Lycopene cyclase CrtY                            | 67906786        | >100    | 93         | uncultured bacterium MedeBAC46A06             |
| 24 | 23818 | 24648 | +      | 15,15'-beta-carotene dioxygenase Blh             | 67906787        | >100    | 89         | uncultured bacterium MedeBAC46A06             |
| 25 | 24655 | 25740 | +      | Isopentenyl-diphosphate delta isomerase Idi      | 67906788        | 90      | 88         | uncultured bacterium MedeBAC46A06             |
| 26 | 25747 | 26499 | -      | Hydroxyacylglutathione hydrolase                 | 68164579        | >100    | 91         | uncultured bacterium BAC17H8                  |
| 27 | 26504 | 26926 | -      | Lactoylglutathione lyase                         | 68164578        | 16      | 45         | uncultured bacterium BAC17H8                  |
| 28 | 27059 | 28051 | -      | 2-Dehydropantoate 2-reductase                    | 67906791        | >100    | 74         | uncultured bacterium MedeBAC46A06             |
| 29 | 28089 | 29588 | -      | Acyl-CoA synthetase                              | 67906792        | >100    | 93         | uncultured bacterium MedeBAC46A06             |
| 30 | 29986 | 30960 | +      | Conserved hypothetical protein                   | 67906793        | >100    | 77         | uncultured bacterium MedeBAC46A06             |
| 31 | 31071 | 31601 | +      | Hypothetical protein                             | 67906794        | >100    | 68         | uncultured bacterium MedeBAC46A06             |
| 32 | 31632 | 33167 | +      | Conserved hypothetical protein                   | 67906795        | 65      | 92         | uncultured bacterium MedeBAC46A06             |
| 33 | 33280 | 33483 | +      | Conserved hypothetical protein                   | 67906797        | >100    | 90         | uncultured bacterium MedeBAC46A06             |
| 34 | 33571 | 34506 | +      | Ketopantoate reductase                           | 67906799        | 82      | 90         | uncultured bacterium MedeBAC46A06             |
| 35 | 34529 | 35332 | +      | Aldolase class II                                | 68164572        | >100    | 83         | uncultured bacterium BAC17H8                  |
| 36 | 35333 | 36496 | -      | Aminotransferase                                 | 67906801        | 0       | 33         | uncultured bacterium MedeBAC46A06             |
| 37 | 36609 | 37511 | -      | Transcriptional regulator                        | 67906803        | 91      | 93         | uncultured bacterium MedeBAC46A06             |
| 38 | 37636 | 38025 | +      | Alpha subunit of protocatechuate 4,5-dioxygenase | 68164568        | >100    | 82         | uncultured bacterium BAC17H8                  |
| 39 | 38027 | 38866 | +      | Beta subunit of protocatechuate 4,5-dioxygenase  | 68164567        | >100    | 74         | uncultured bacterium BAC17H8                  |
| 40 | 38901 | 39626 | +      | Acyl transferase                                 | 68164566        | >100    | 86         | uncultured bacterium BAC17H8                  |
| 41 | 39910 | 40116 | -      | Hypothetical protein                             | 18161831        | 45      | 57         | <i>Pyrobaculum aerophilum</i> (Crenarchaeota) |
